# Supplementary material for: MicroRNA and piRNA Profiles in Normal Human Testis Detected by Next Generation Sequencing
Source: PLOS journal article supplement (doi:10.1371/journal.pone.0066809), 2013-06-24
Supplement: S5 (10.1371/journal.pone.0066809.s005) [file journal.pone.0066809.s005]

Table S1. Statistic results of sequencing reads.

| Type                    | Counts     | %      |
|-------------------------|------------|--------|
| Total reads             | 15,118,197 |        |
| Low quality reads       | 259,170    | 1.714  |
| High quality reads      | 14,859,027 | 98.286 |
| Clean reads             | 14,608,234 | 96.627 |
| 3' adapter null         | 56,833     | 0.376  |
| Insert null             | 1,307      | 0.009  |
| 5' adapter contaminants | 8,060      | 0.053  |
| Smaller than 18 nt      | 184,068    | 1.218  |
| Poly A                  | 525        | 0.003  |
